# Supplementary material
Source: PubMed Central journal article supplement (PMC7024778)
Supplement: cm202000075.SD1.pdf [file cm202000075.SD1.pdf]

**Figure S1.** Summary of cocultures with permissible Raji and Sup T cell lines and SRV antibody reactive, PCR negative donor PBMCs.

| Day | Manipulations/Observations                                                               | PCR                                                                |
|-----|------------------------------------------------------------------------------------------|--------------------------------------------------------------------|
| -2  | Stimulate PBMC with Staph Entertoxin A                                                   | Donors 1-6 negative<br>Donors 1-6 Raji negative<br>Donors 1-6 SupT |
| 0   | Coculture PBMC with Raji and Sup T                                                       | negative                                                           |
| 4   | No CPE. Add one half volume fresh media.<br>Clumping but no CPE.                         | Not tested<br>Donors 1-6 Raji negative<br>Donors 1-6 SupT          |
| 7   | Add fresh cells to double volume.<br>Clumping but no CPE                                 | negative<br>Donors 1-6 Raji negative<br>Donors 1-6 SupT            |
| 11  | Replace one half volume with fresh media.                                                | negative<br>Donors 1-6 Raji negative<br>Donors 1-6 SupT            |
| 14  | No CPE but enlarged cells only in donor #4/<br>Sup T. Add one fourth volume fresh media. | negative<br>Donors 1-6 Raji negative<br>Donors 1-6 SupT            |
| 18  | No CPE. Clumps and debris in Raji cultures<br>Sup T. Add one fourth volume fresh cells.  | negative<br>Donors 1-6 Raji negative<br>Donors 1-6 SupT            |
| 21  | No CPE. Add one fourth volume fresh cells.                                               | negative<br>Donors 1-6 Raji negative<br>Donors 1-6 SupT            |
| 25  | No CPE. Terminate culture.                                                               | negative<br>Donors 1-6 Raji negative<br>Donors 1-6 SupT            |
